# Supplementary material for: Oxyntomodulin regulates resetting of the liver circadian clock by food
Source: eLife journal article supplement (doi:10.7554/elife.06253), 2015-03-30
Supplement: supp [file elife-06253-supp-v1.zip]

Archive with 6 entries (6 files):
- elife_poa_e06253_Figure_1_figure_supplement_1.tif
- elife_poa_e06253_Figure_2_figure_supplement_1.pdf
- elife_poa_e06253_Figure_6_figure_supplement_1.tif
- elife_poa_e06253_Revised_manuscript_with_markups.doc
- elife_poa_e06253_Figure_6_source_data_1.doc
- elife_poa_e06253_Figure_1_source_data_1.xlsx
