# Supplementary material for: Oxyntomodulin regulates resetting of the liver circadian clock by food
Source: eLife journal article supplement (doi:10.7554/elife.06253), 2015-03-30
Supplement: supp [file elife-06253-supp-v1.zip › elife_poa_e06253_Figure_1_source_data_1.xlsx]

## Sheet: Formatted table
Figure 1 - source data 1
Peptide	D period (h)	D amplitude (%)	D phase (h)	> ± 3SD
Exendin-4	3.2	-69.3574	-8.463	*
Oxyntomodulin (Mouse)	2.3	-54	-8	*
Motilin, Prepro (71-92) (Human)	1.9	-77.3361	-7.058	*
Ghrelin (Rat) (Des-Octanoyl3)	0.8	-85.0874	-5.94
Gastrin I (Human)	1.4	-68.9998	-5.527
Glucagon (Human)	1.3	-40.24	-4.8
PACAP38 (Human, Ovine, Rat)	0.4	-39.52	-4.629
Galanin (1-30), Prepro (Human)	1	-67.8883	-4.445
Apelin-13 (Human, Bovine)	1	-42.9171	-4.327
FGF-21 (Mouse)	2.7	-10.8414	-4.31
Catestatin (Human)	3	-54.435	-4.303
PACAP38 (Frog)	2.4	-33.4638	-4.209
Galanin (Porcine)	1.2	-63.6485	-4.067
Motilin, Prepro (84-111) (Human)	1.7	-68.7059	-3.897
Motilin, Prepro (50-70) (Human)	1.6	-61.01	-3.857
PACAP(6-27) (Human, Ovine, Rat)	2	-34.3172	-3.84
Secretin (Canine)	-0.5	-67.8937	-3.814
Ghrelin(1-14) (Human) (Des-Octanoyl3)	0.9	-67.0242	-3.72
Des-Q14-Ghrelin (Rat)	2	-66.5482	-3.701
Glucagon-Like Peptide 1 Amide (GLP 1) (7-36) (Human)	2.4	-68.5311	-3.676
Calcitonin Gene Related Peptide (CGRP) (Rat)	1.4	-18.6995	-3.617
Ghrelin (1-5)-NH2 (Des-Octanoyl3)	2	-67.9155	-3.613
Pancreastatin (33-49) (Porcine)	-2.4	-37.1599	3.6	*
Motilin, Prepro (93-115) (Human)	2.1	-52.9775	-3.599
Cortistain-14 (Rat)	2.8	-38.2524	-3.424
Neuropeptide Y (NPY) (3-36) (Porcine)	-3.9	-74.5354	3.365	*
Endothelin-1 (ET-1), Big (Human)	0.9	-40.1777	-3.363
Motilin (Human, Porcine)	0.6	-74.9198	-3.31
Salusin Alpha-Gly	1.3	-20.8519	-3.272
Endothelin-1 (ET-1), Big (Rat)	-0.4	-36.868	-3.272
TLQP-21 (Rat)	2.8	-34.0755	-3.164
Galanin (1-16) (Porcine, Rat)	1.9	-71.5602	-3.144
Galanin (108-123), Prepro (Porcine)	1.7	-69.1663	-3.118
Calcitonin Gene Related Peptide (CGRP) II (Human)	2.2	-29.5349	-3.111
Minigastrin	0.9	-51.0025	-3.1
PYY (2-36), Gly (Human)	1.1	-43.6309	-3.089
PACAP38 (16-38) (Human, Ovine, Rat)	0.4	-47.7572	-3.082
C Peptide (Rat)	0.6	-38.7269	-3.027
Galanin (Bovine)	1.9	-69.0779	-2.991
Galanin-like Peptide (36-60) (Human)	0.5	-69.9455	-2.991
Endothelin-3 (ET-3) (Human, Rat, Porcine, Rabbit)	0.6	-37.502	-2.984
(Oxyntomodulin) (Glucagon 37) (Porcine)	3.4	18.1502	2.971	*
Endothelin-1 (ET-1) (H,P,C,R,M,B)	1.8	-66.3567	-2.935
FGF-21 (Human)	1.5	-10.7835	-2.927
Peptide YY (PYY) (Human)	0.9	-62.9858	-2.908
Endorphin, Ac-Alpha (Lipotropin (61-76), Ac-Alpha)	1.9	-35.0411	-2.905
Gastrin Releasing Peptide (GRP) (Porcine)	0.7	-64.073	-2.871
Ghrelin (Rat)	1.4	-83.2969	-2.829
Enkephalin-Arg-Gly-Leu, Met	1.8	-50.8972	-2.818
PYY (2-36), Gly (Rat)	0.4	-51.0801	-2.81
PACAP27-NH2 (Human, Ovine, Rat)	2.5	-37.8352	-2.787
Leu-Enkephalin	2.3	-54.8615	-2.768
Calcitonin Gene Related Peptide (CGRP) (Human)	1	-25.8705	-2.7
Apelin-12	0.5	-18.3881	-2.646
PACAP(6-38) (Human, Ovine, Rat)	1	-39.1773	-2.574
Endothelin-1 (ET-1) (22-38), Big (Human)	0.6	-46.7961	-2.564
Salusin 50-MER	2.2	-67.6711	-2.556
Gastrin Releasing Peptide (GRP) (Human)	0.5	-50.3002	-2.515
Intermedin (8-47) (Human)	2.8	-45.4264	-2.503
Ghrelin(3-28) (Rat)	1.4	-74.2861	-2.492
Prepro-Augurin (133-184) (Human)	1.6	-25.9561	-2.478
Adrenomedullin 1-52 (Human)	1.9	-27.0931	-2.4
Endorphin, Beta-Neo	0.9	-42.9006	-2.386
TLQP-21 (Human)	1.1	-22.2009	-2.372
Dynorphin A (1-13) Amide (Porcine)	2.4	-55.7756	-2.349
Beacon (30-73)	1.6	-33.5103	-2.336
Neurokinin A, (Neuromedin L), (Substance K)	-0.4	-43.5323	-2.316
Calcitonin Gene Related Peptide (CGRP) (8-37) (Rat)	1.5	-39.9711	-2.305
Pancreatic Polypeptide (PPP) (Rat)	0.6	-40.5403	-2.288
CCK Flanking Peptide (Non-Sulfated)	1.3	-52.1593	-2.283
Obestatin (Rat, Mouse)	0.4	-70.9162	-2.273
Neuropeptide Y (NPY) (68-97), Prepro (Human)	1.5	-65.4335	-2.235
Amylin (1-13) (Human)	0.8	-45.2155	-2.215
[Ac-His1,D-Phe2,Lys15,Arg16,Leu27]-VIP(1-7)-GRF(8-27)	0.6	-45.2484	-2.214
Secretin (Mouse)	1.6	-70.4917	-2.212
Amylin (Rat)	2.1	-30.8683	-2.206
CCK (27-33)	2.5	-61.1112	-2.195
Salusin Beta	2.1	-64.7644	-2.163
Dynorphin A (1-8) (Porcine)	2	-64.2861	-2.162
Dynorphin A (1-13) (Porcine)	2.1	-41.8061	-2.156
Secretin (Human)	-0.2	-26.8042	-2.142
Prepro-Chromogranin A (374-388) (Mouse)	1.2	-45.7957	-2.131
Vasoactive Intestinal Peptide (VIP) (Human, Porcine, Rat)	0.4	-48.717	-2.131
Endothelin-2 (ET-2) (Human, Canine)	-0.8	38.8824	-2.118
Vasoactive Intestinal Peptide (VIP) (Guinea Pig)	0.5	-43.9173	-2.117
Enkephalin, [D-Ala2,D-Leu5]	1.6	-33.543	-2.105
Prosomatostatin (1-32) (Porcine)	1.7	-50.1292	-2.073
[pGlu33]-Pancreastatin (33-49) (Porcine)	0.3	2.48711	-2.049
Cortistatin-29 (Human)	1.2	-46.4481	-2.036
Endothelin-1 (ET-1), Big (Porcine)	-0.6	-46.4878	-2.036
Motilin, Prepro (71-115) (Human)	2.2	-69.7619	-2.028
Ghrelin (17-28) (Human, Rat)	0.7	-75.7762	-2.024
Pancreastatin (Rat)	2.7	-66.7268	-2.015
Somatostatin-28 (1-14)	1.2	-37.3217	-2.015
Galanin (Human)	0.9	-71.5098	-2.012
Exendin-3	1.1	-61.0074	-2.008
Cortistain-29 (Rat)	1.4	-34.0747	-1.997
Prepro-Augurin (71-107) (Human)	2.4	-4.37349	-1.995
Galanin (Rat)	2	-83.4451	-1.978
VIP Receptor Binding Inhibitor (L-8-K)	0.4	-47.0377	-1.961
Endorphin, Beta (Porcine)	1.9	-45.3507	-1.952
Neuropeptide Y (NPY) (Porcine)	0.3	-67.543	-1.895
Gastrin, Little (Rat) (Little Gastrin)	0	-52.0438	-1.874
PACAP-Related Peptide (Rat)	1.3	-51.6568	-1.843
Catestatin (Rat)	2.2	-40.6678	-1.814
Dynorphin B / Rimorphin (Porcine)	1.5	-34.3809	-1.765
Alarin (Human)	0.6	-57.1459	-1.763
Pentagastrin	0.7	-63.4694	-1.746
(Pro3) GIP (Rat)	1.2	-51.9727	-1.725
[Dap-Octanoyl3)-Ghrelin (Human)	1.9	-30.7833	-1.718
Neuropeptide Y (NPY) (13-36) (Porcine)	1	-20.9494	-1.707
CCK (26-33) (Non-Sulfated)	0.3	-44.9183	-1.707
Cortistatin-17 (Human)	0.7	-44.8238	-1.679
Somatostatin-28	1.5	-85.4295	-1.673
Adrenomedulin 1-50 (Rat)	1.8	-16.5682	-1.672
Endorphin, Gamma (Beta-Lipotropin 61-77)	2	-26.1785	-1.663
Endorphin, Beta (Rat)	1	-28.712	-1.641
Enkephalin-Thr, [D-Thr2]-Leu	1.6	-33.8881	-1.638
Calcitonin Gene Related Peptide (CGRP) (8-37) (Human)	1.4	-21.414	-1.635
Neurokinin B (Neuromedin K)	-0.1	-27.3863	-1.627
Ghrelin (1-14) (Human)	0.1	-46.7181	-1.618
PYY (4-36), Gly (Human)	0.6	-42.0374	-1.552
Ghrelin (1-4) Amide	1.3	-34.8022	-1.528
GIP (D-Ala3 ) (Human)	0.5	-68.7478	-1.522
Chromogranin B (516-535) (Mouse)	-1.6	2.3197	1.512
Secretin (Rat)	1.2	-76.9216	-1.509
Pancreastatin (Porcine)	-0.8	-46.0975	-1.497
Apelin-36 (Rat)	0.6	8.4516	-1.482
Secretin (Chicken)	0.2	-12.487	-1.47
Apelin-19 (Human, Bovine)	-0.2	-42.5874	-1.464
Ghrelin (1-5)-NH2	0	-52.6643	-1.462
Neuropeptide Y (NPY) (16-36) (Porcine)	1	-44.3066	-1.443
Galanin-like Peptide (Porcine)	0.8	-44.0606	-1.44
GIP (3-42) (Human)	0.6	-38.723	-1.433
Pro-Adrenomedullin N-20 (Human)	1.4	-34.3237	-1.391
VIP1 Agonist: [Lys15, Arg16, Leu27]-VIP (1-7)-GRF (8-27)	0.2	-46.8993	-1.382
Neurotensin (1-7)	0.8	-45.3763	-1.375
Gastrin Related Peptide	0.7	-74.1646	-1.363
Pancreatic Polypeptide (PPP) (Human)	1.4	-27.8667	-1.358
Apelin-17 (Human, Bovine)	-0.9	-26.6387	1.355
Neuropeptide Y (NPY) Free Acid (Human)	1	-57.6211	-1.326
PYY (4-36), Gly (Rat)	0.2	-43.4931	-1.326
Amylin (14-24) (Human)	1.6	-70.8201	-1.306
Endothelin C-Terminal Hexapeptide (Human, Porcine, Rat)	-0.1	-33.7235	-1.305
Motilin (Canine)	0.3	-39.8095	-1.304
Substance P	1	-52.475	-1.293
Antrin (Pro-Somatostatin 1-10, Preprosomatostatin 25-34)	2.2	-51.6365	-1.288
Apelin-36 (Human)	0.7	-26.4809	-1.263
Amylin Amide (Human)	0.1	-49.395	-1.221
Galanin (1-19) (Human)	-0.5	-47.3745	-1.203
Insulin (Human)	-0.6	-10.6152	1.181
Prepro-Spexin (36-58) (Human)	0.2	-17.4223	-1.167
Gastric Inhibitory Polypeptide (Porcine)	0.8	-53.387	-1.16
Neurotensin	0.5	-44.1704	-1.136
Neuropeptide Y (NPY) (Human, Rat)	0.7	-54.67	-1.135
[Trp3,Arg5]-Ghrelin (1-5) (Human)	1.3	-34.1213	-1.109
Obestatin (Human, Monkey)	2.1	-82.7039	-1.108
Glucagon (72-107) Amide, Prepro) (Human)	0	-61.1285	-1.093
PHI (Porcine)	0.8	-33.94	-1.044
Somatostatin	2.2	-81.6632	-1
PHI (Human) / PHM-27, Human)	0.5	-39.6771	-0.986
C Peptide (Human)	-0.7	20.1193	0.946
Endothelin-1 (ET-1) (6-21), [Ala1,3,11,15] (H, P, C, R, M, B)	0.7	-32.1713	-0.897
Vasoactive Intestinal Peptide (VIP) Antagonist	0.5	-45.7806	-0.869
Pancreastatin (hPST-52) (Human)	0.4	-55.33	-0.83
Galanin-like Peptide (Human)	0.8	-55.5738	-0.809
Beacon (47-73)	-0.6	-14.2988	-0.809
Apelin, Prepro (23-57) (Human)	-1.3	-29.4647	0.8
pGlu1-Apelin-13, Ala13 (Human, Bovine)	-0.7	-46.8514	-0.782
Pancreastatin (24-52) (hPST-29)	0.4	-2.54352	-0.776
Endothelin-1 (ET-1) (18-50) Prepro (Human)	0.5	-28.7882	-0.732
Alarin (Rat)	1.5	-59.2231	-0.699
PACAP-Related Peptide (PRP) (Human)	0.5	-32.9111	-0.657
Progastrin, Carboxyl-Terminal Flanking Peptide of Rat (FnBP)	1.8	-65.6111	-0.649
Apelin-15 (Human, Bovine)	0	-22.1937	-0.645
Big Endothelin-3(ET-3) (22-41) Amide	0	-33.755	-0.619
Apelin, Prepro (23-46) (Human)	-1.1	-31.1636	0.618
Prepro-Spexin (73-116) (Human)	1.5	-53.7114	-0.618
Intermedin (Human)	-0.3	-8.86564	0.616
Spexin	0.2	-1.41532	0.5
Peptide YY (PYY)(13-36)(Porcine, Rat)	0.9	-47.0452	-0.468
Apelin-13, pGlu1, (Human, Bovine)	-0.4	-46.4685	0.464
Ghrelin C-terminal, Hexapeptide	0	-79.7289	-0.454
Apelin-28 (Human)	-0.8	-42.9556	-0.445
Endothelin-3 (ET-3) (159-179), Prepro (Human)	0.1	-31.4416	-0.391
Apelin-16 (Human, Bovine0	0.3	-34.3293	-0.373
Vasoactive Intestinal Peptide (VIP) Receptor Antagonist	0.4	-47.3905	-0.327
Galanin-like Peptide (Rat)	0.7	-57.4989	-0.292
Glucagon-Like Peptide 2 (GLP 2) (Human)	1.5	-72.0364	-0.271
Apelin-13, Ala13, (F13A) (Human, Bovine)	0.1	-7.49817	-0.172
Ghrelin (Human)	-1.1	-50.6814	-0.145
PHI (Rat)	-2	-51.0418	-0.126
Neurokinin B, [MePhe7]	2.4	-30.3544	-0.119
Peptide YY (PYY) (Porcine, Rat)	-0.2	-51.4786	0.076
Excluded from analysis:				Comment
Pancreastatin (26-51) (Rat)	arr.	arr.	arr.
Glucagon-Like Peptide 1 (GLP 1) (7-37) (Human)	arr.	arr.	arr.
Salusin Alpha	arr.	arr.	arr.
Neurotensin (8-13)	4.8	43.2202	-7.381	D tau > 4 h
Catestatin (Mouse)	4.8	60.5508	-2.327	D tau > 4 h
Endorphin, Beta (Human)	4	61.5292	-3.406	D tau > 4 h
