# Supplementary material for: Oxyntomodulin regulates resetting of the liver circadian clock by food
Source: eLife journal article supplement (doi:10.7554/elife.06253), 2015-03-30
Supplement: supp [file elife-06253-supp-v1.zip › elife_poa_e06253_Figure_2_figure_supplement_1.pdf]

Exons 2-3

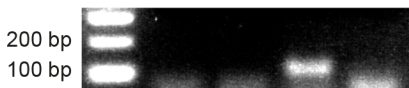

Exons 8-9

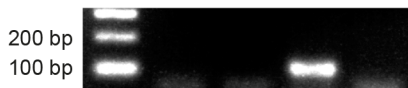

Exons 3-4

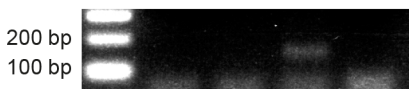

Exons 9-10

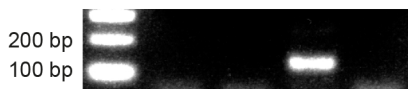

Exons 4-5

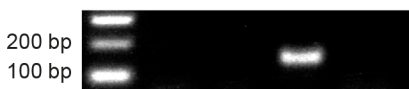

Exons 10-11

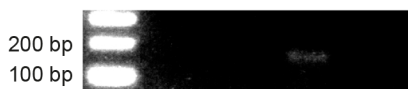

Exons 5-6

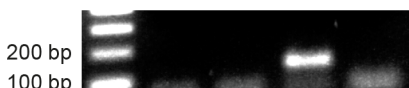

Exons 11-12

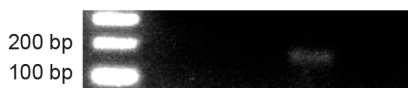

Exons 6-7

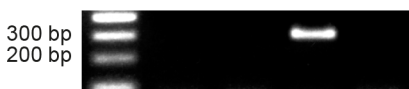

Exons 12-13

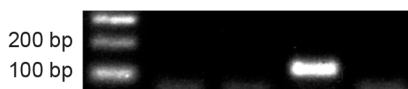

Exons 7-8

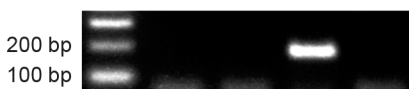 $\beta$ -actin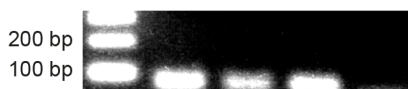

WT liver  
GLP-1R<sup>-/-</sup> liver  
WT pancreas  
no template

WT liver  
GLP-1R<sup>-/-</sup> liver  
WT pancreas  
no template

OXM Figure 2 - figure supplement 1
