# Supplementary figures and images for: Oxyntomodulin regulates resetting of the liver circadian clock by food
Source: eLife journal article supplement (doi:10.7554/elife.06253), 2015-03-30

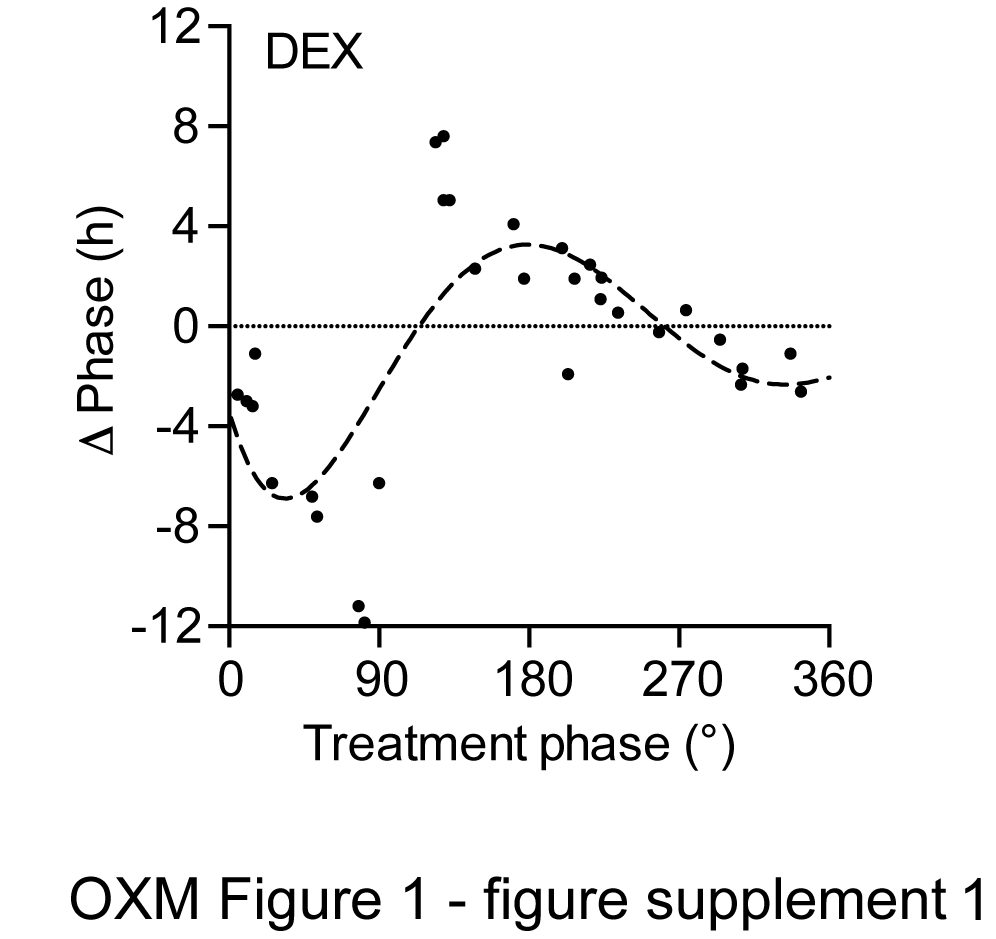

Supplement: supp [file elife-06253-supp-v1.zip › elife_poa_e06253_Figure_1_figure_supplement_1.tif]

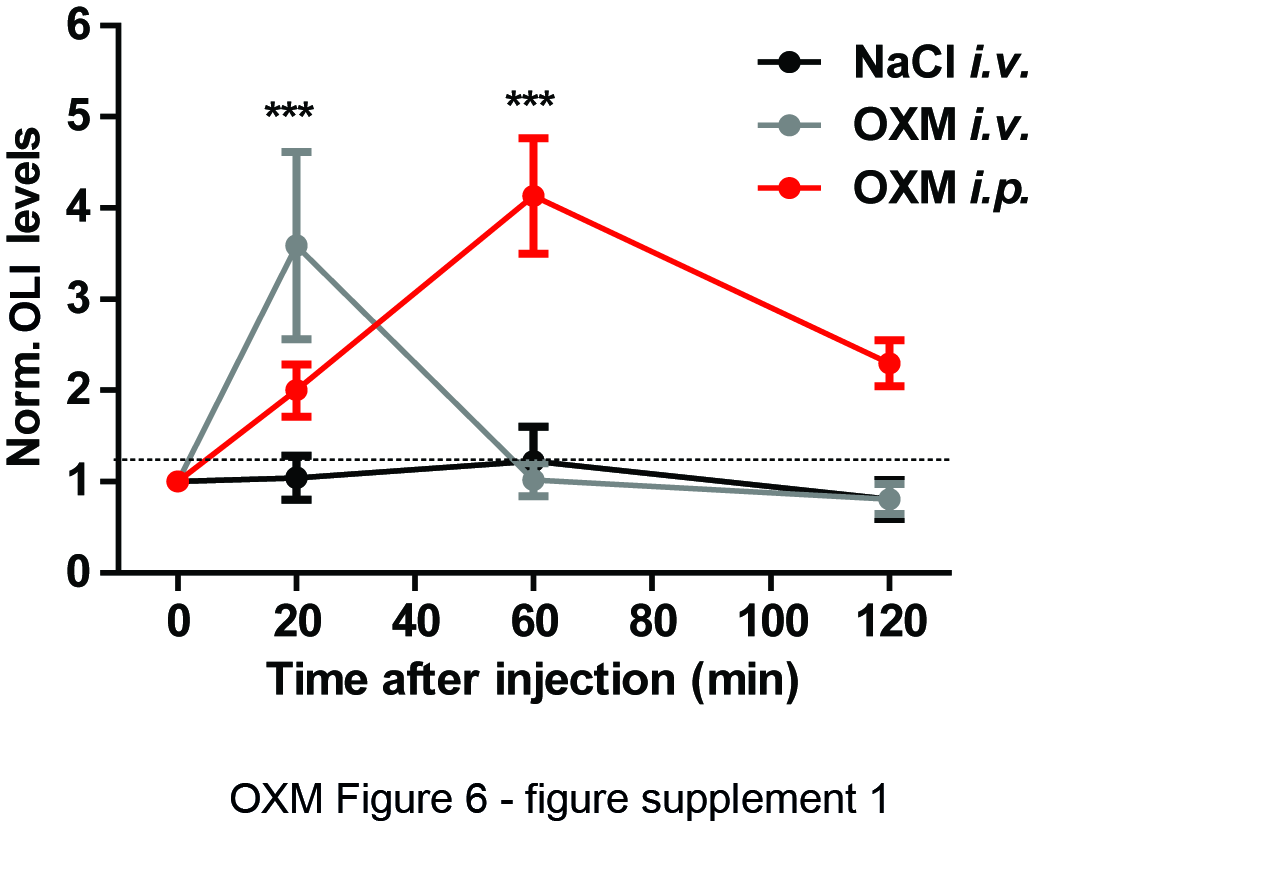

Supplement: supp [file elife-06253-supp-v1.zip › elife_poa_e06253_Figure_6_figure_supplement_1.tif]
